# Supplementary material for: IgM triplet in neonatal diagnosis by immunoblotting and its potential use as a diagnostic marker for congenital toxoplasmosis
Source: PubMed Central journal article supplement (PMC10236937; doi:10.1051/parasite/2023020), 2023-06-02
Supplement: parasite-30-19-s1.pdf [file parasite-30-19-s1.pdf]

| <b>Patient</b> | <b>Trimester of maternal infection</b> | <b>Amniotic fluid qPCR results</b> | <b>IgM triplet of the mother</b> | <b>IgM triplet of the infant</b> | <b>Conventional reading IgG and IgM profiles (1: different pattern; 0: no supplementary bands)</b> | <b>Conventional reading + presence of the infant's IgM triplet (1: CT diagnosis, 0: absence of arguments for CT diagnosis by IB)</b> | <b>ISAgA or Platelia Toxo IgM</b> |
|----------------|----------------------------------------|------------------------------------|----------------------------------|----------------------------------|----------------------------------------------------------------------------------------------------|--------------------------------------------------------------------------------------------------------------------------------------|-----------------------------------|
| 1              | 1st                                    | NP                                 | YES                              | YES                              | 1                                                                                                  | 1                                                                                                                                    | POS                               |
| 2              | 1st                                    | NP                                 | YES                              | YES                              | 0                                                                                                  | 1                                                                                                                                    | POS                               |
| 3              | 1st                                    | NEG                                | NO                               | NO                               | 0                                                                                                  | 0                                                                                                                                    | NEG                               |
| 4              | 1st                                    | NP                                 | YES                              | YES                              | 0                                                                                                  | 1                                                                                                                                    | POS                               |
| 5              | 1st                                    | POS                                | NO                               | NO                               | 0                                                                                                  | 0                                                                                                                                    | NEG                               |
| 6              | 1st                                    | NEG                                | NO                               | NO                               | 0                                                                                                  | 0                                                                                                                                    | POS                               |
| 7              | 1st                                    | NP                                 | NO                               | NO                               | 0                                                                                                  | 0                                                                                                                                    | NEG                               |
| 8              | 1st                                    | NEG                                | YES                              | YES                              | 1                                                                                                  | 1                                                                                                                                    | POS                               |
| 9              | 1st                                    | NP                                 | NO                               | NO                               | 1                                                                                                  | 1                                                                                                                                    | NEG                               |
| 10             | 1st                                    | NEG                                | YES                              | YES                              | 1                                                                                                  | 1                                                                                                                                    | POS                               |
| 11             | 1st                                    | POS                                | YES                              | YES                              | 1                                                                                                  | 1                                                                                                                                    | POS                               |
| 12             | 1st                                    | POS                                | NO                               | YES                              | 1                                                                                                  | 1                                                                                                                                    | NEG                               |
| 13             | 1st                                    | POS                                | YES                              | NO                               | 0                                                                                                  | 0                                                                                                                                    | NEG                               |
| 14             | 1st                                    | NEG                                | NO                               | NO                               | 1                                                                                                  | 1                                                                                                                                    | POS                               |
| 15             | 1st                                    | POS                                | NO                               | NO                               | 1                                                                                                  | 1                                                                                                                                    | POS                               |
| 16             | 1st                                    | POS                                | NO                               | NO                               | 1                                                                                                  | 1                                                                                                                                    | NEG                               |
| 17             | 2nd                                    | POS                                | NO                               | NO                               | 0                                                                                                  | 0                                                                                                                                    | NEG                               |
| 18             | 2nd                                    | POS                                | NO                               | NO                               | 0                                                                                                  | 0                                                                                                                                    | POS                               |
| 19             | 2nd                                    | POS                                | NO                               | NO                               | 0                                                                                                  | 0                                                                                                                                    | NEG                               |
| 20             | 2nd                                    | POS                                | YES                              | NO                               | 0                                                                                                  | 0                                                                                                                                    | POS                               |
| 21             | 2nd                                    | POS                                | NO                               | NO                               | 0                                                                                                  | 0                                                                                                                                    | NEG                               |
| 22             | 2nd                                    | POS                                | NO                               | NO                               | 0                                                                                                  | 0                                                                                                                                    | NEG                               |
| 23             | 2nd                                    | POS                                | NO                               | NO                               | 0                                                                                                  | 0                                                                                                                                    | NEG                               |
| 24             | 2nd                                    | POS                                | YES                              | YES                              | 0                                                                                                  | 1                                                                                                                                    | NR                                |
| 25             | 2nd                                    | POS                                | NO                               | NO                               | 0                                                                                                  | 0                                                                                                                                    | NEG                               |
| 26             | 2nd                                    | POS                                | NO                               | NO                               | 0                                                                                                  | 0                                                                                                                                    | NEG                               |
| 27             | 2nd                                    | NP                                 | NO                               | NO                               | 1                                                                                                  | 1                                                                                                                                    | POS                               |
| 28             | 2nd                                    | POS                                | YES                              | YES                              | 1                                                                                                  | 1                                                                                                                                    | POS                               |
| 29             | 2nd                                    | POS                                | NO                               | NO                               | 1                                                                                                  | 1                                                                                                                                    | NEG                               |
| 30             | 2nd                                    | POS                                | NO                               | NO                               | 0                                                                                                  | 0                                                                                                                                    | NEG                               |
| 31             | 2nd                                    | POS                                | NO                               | NO                               | 0                                                                                                  | 0                                                                                                                                    | NEG                               |
| 32             | 2nd                                    | POS                                | YES                              | NO                               | 0                                                                                                  | 0                                                                                                                                    | POS                               |
| 33             | 2nd                                    | NP                                 | NO                               | YES                              | 1                                                                                                  | 1                                                                                                                                    | POS                               |
| 34             | 2nd                                    | NP                                 | NO                               | YES                              | 1                                                                                                  | 1                                                                                                                                    | POS                               |
| 35             | 2nd                                    | POS                                | NO                               | YES                              | 1                                                                                                  | 1                                                                                                                                    | NEG                               |
| 36             | 2nd                                    | POS                                | NO                               | NO                               | 0                                                                                                  | 0                                                                                                                                    | NEG                               |
| 37             | 2nd                                    | POS                                | NO                               | NO                               | 0                                                                                                  | 0                                                                                                                                    | NEG                               |

|    |     |     |     |     |   |   |     |
|----|-----|-----|-----|-----|---|---|-----|
| 38 | 2nd | POS | NO  | NO  | 1 | 1 | NEG |
| 39 | 2nd | NEG | NO  | NO  | 1 | 1 | POS |
| 40 | 2nd | POS | YES | YES | 1 | 1 | POS |
| 41 | 2nd | POS | YES | NO  | 0 | 0 | NEG |
| 42 | 2nd | POS | YES | NO  | 0 | 0 | POS |
| 43 | 2nd | POS | YES | YES | 0 | 1 | POS |
| 44 | 2nd | NP  | YES | YES | 0 | 1 | POS |
| 45 | 2nd | POS | NO  | NO  | 1 | 1 | NEG |
| 46 | 2nd | POS | YES | YES | 1 | 1 | POS |
| 47 | 2nd | POS | YES | YES | 0 | 1 | NEG |
| 48 | 2nd | POS | NO  | NO  | 1 | 1 | NEG |
| 49 | 2nd | POS | YES | NO  | 0 | 0 | NEG |
| 50 | 2nd | POS | NO  | NO  | 0 | 0 | POS |
| 51 | 2nd | POS | NO  | NO  | 0 | 0 | NEG |
| 52 | 2nd | POS | NO  | NO  | 1 | 1 | NEG |
| 53 | 2nd | NP  | NO  | NO  | 1 | 1 | POS |
| 54 | 2nd | POS | NO  | YES | 1 | 1 | POS |
| 55 | 2nd | POS | YES | YES | 0 | 1 | POS |
| 56 | 2nd | NP  | NO  | YES | 0 | 1 | NEG |
| 57 | 2nd | POS | YES | YES | 1 | 1 | POS |
| 58 | 2nd | POS | NO  | YES | 0 | 1 | NEG |
| 59 | 2nd | POS | YES | YES | 0 | 1 | NEG |
| 60 | 2nd | NP  | YES | YES | 0 | 1 | NEG |
| 61 | 2nd | POS | NO  | NO  | 0 | 0 | POS |
| 62 | 2nd | NP  | NO  | NO  | 0 | 0 | POS |
| 63 | 2nd | POS | NO  | NO  | 1 | 1 | POS |
| 64 | 2nd | NP  | NO  | NO  | 0 | 0 | POS |
| 65 | 2nd | POS | YES | YES | 1 | 1 | POS |
| 66 | 2nd | POS | NO  | YES | 1 | 1 | NEG |
| 67 | 2nd | POS | YES | YES | 1 | 1 | POS |
| 68 | 2nd | POS | YES | YES | 0 | 1 | POS |
| 69 | 2nd | POS | NO  | NO  | 0 | 0 | NEG |
| 70 | 2nd | POS | NO  | NO  | 0 | 0 | NEG |
| 71 | 2nd | NP  | NO  | NO  | 1 | 1 | POS |
| 72 | 2nd | POS | NO  | NO  | 1 | 1 | POS |
| 73 | 2nd | POS | YES | YES | 1 | 1 | POS |
| 74 | 2nd | NP  | NO  | YES | 1 | 1 | POS |
| 75 | 2nd | POS | YES | YES | 1 | 1 | NEG |
| 76 | 2nd | NP  | YES | YES | 1 | 1 | NEG |
| 77 | 2nd | POS | YES | NO  | 0 | 0 | NEG |
| 78 | 2nd | NEG | YES | NO  | 0 | 0 | NEG |
| 79 | 2nd | POS | NO  | NO  | 0 | 0 | NEG |
| 80 | 2nd | NEG | NO  | NO  | 0 | 0 | POS |
| 81 | 2nd | POS | NO  | NO  | 0 | 0 | POS |
| 82 | 2nd | POS | NO  | NO  | 1 | 1 | POS |

|     |     |     |     |     |   |   |     |
|-----|-----|-----|-----|-----|---|---|-----|
| 83  | 2nd | POS | YES | YES | 1 | 1 | POS |
| 84  | 2nd | NP  | YES | YES | 0 | 1 | POS |
| 85  | 2nd | POS | YES | YES | 0 | 1 | POS |
| 86  | 2nd | POS | NO  | NO  | 0 | 0 | POS |
| 87  | 2nd | POS | NO  | NO  | 1 | 1 | POS |
| 88  | 2nd | NP  | NO  | NO  | 1 | 1 | POS |
| 89  | 2nd | NP  | NO  | NO  | 0 | 0 | POS |
| 90  | 2nd | NEG | NO  | NO  | 0 | 0 | NEG |
| 91  | 3rd | NP  | YES | YES | 0 | 1 | POS |
| 92  | 3rd | ND  | YES | YES | 1 | 1 | POS |
| 93  | 3rd | POS | NO  | YES | 1 | 1 | POS |
| 94  | 3rd | POS | YES | YES | 0 | 1 | NEG |
| 95  | 3rd | POS | NO  | NO  | 1 | 1 | POS |
| 96  | 3rd | POS | NO  | NO  | 0 | 0 | NEG |
| 97  | 3rd | POS | YES | YES | 1 | 1 | POS |
| 98  | 3rd | POS | NO  | YES | 1 | 1 | POS |
| 99  | 3rd | POS | NO  | YES | 1 | 1 | POS |
| 100 | 3rd | POS | YES | YES | 0 | 1 | NEG |
| 101 | 3rd | NP  | NO  | YES | 0 | 1 | POS |
| 102 | 3rd | POS | YES | YES | 0 | 1 | NEG |
| 103 | 3rd | NP  | YES | YES | 0 | 1 | POS |
| 104 | 3rd | POS | NO  | NO  | 0 | 0 | POS |
| 105 | 3rd | POS | NO  | NO  | 0 | 0 | POS |
| 106 | 3rd | ND  | NO  | NO  | 0 | 0 | NEG |
| 107 | 3rd | POS | NO  | NO  | 0 | 0 | POS |
| 108 | 3rd | NP  | NO  | NO  | 0 | 0 | NEG |
| 109 | 3rd | NP  | NO  | NO  | 0 | 0 | NEG |
| 110 | 3rd | POS | NO  | NO  | 0 | 0 | POS |
| 111 | 3rd | POS | NO  | NO  | 0 | 0 | NEG |
| 112 | 3rd | POS | NO  | NO  | 1 | 1 | POS |
| 113 | 3rd | POS | NO  | NO  | 0 | 0 | POS |
| 114 | 3rd | NP  | NO  | NO  | 1 | 1 | POS |
| 115 | 3rd | ND  | NO  | YES | 1 | 1 | POS |
| 116 | 3rd | POS | YES | YES | 1 | 1 | POS |
| 117 | 3rd | ND  | YES | YES | 1 | 1 | POS |
| 118 | 3rd | ND  | YES | YES | 1 | 1 | POS |
| 119 | 3rd | POS | YES | YES | 1 | 1 | POS |
| 120 | 3rd | NP  | YES | YES | 1 | 1 | POS |
| 121 | 3rd | POS | NO  | NO  | 0 | 0 | NEG |
| 122 | 3rd | NP  | NO  | NO  | 1 | 1 | POS |
| 123 | 3rd | ND  | NO  | YES | 1 | 1 | POS |
| 124 | 3rd | POS | NO  | YES | 0 | 1 | POS |
| 125 | 3rd | POS | YES | YES | 0 | 1 | POS |
| 126 | 3rd | NP  | NO  | NO  | 0 | 0 | NEG |
| 127 | 3rd | POS | NO  | YES | 1 | 1 | NEG |

|     |     |     |     |     |   |   |     |
|-----|-----|-----|-----|-----|---|---|-----|
| 128 | 3rd | ND  | YES | YES | 1 | 1 | POS |
| 129 | 3rd | POS | NO  | YES | 1 | 1 | POS |
| 130 | 3rd | NP  | YES | YES | 1 | 1 | POS |
| 131 | 3rd | NP  | YES | YES | 1 | 1 | POS |
| 132 | 3rd | NP  | YES | YES | 1 | 1 | POS |
| 133 | 3rd | ND  | YES | YES | 1 | 1 | POS |
| 134 | 3rd | ND  | YES | YES | 0 | 1 | POS |
| 135 | 3rd | NP  | NO  | NO  | 0 | 0 | POS |
| 136 | 3rd | POS | YES | YES | 1 | 1 | POS |
| 137 | 3rd | NP  | YES | YES | 1 | 1 | POS |
| 138 | 3rd | ND  | YES | YES | 1 | 1 | POS |
| 139 | 3rd | POS | NO  | YES | 1 | 1 | POS |
| 140 | 3rd | NP  | YES | YES | 1 | 1 | POS |
| 141 | 3rd | NP  | YES | YES | 1 | 1 | POS |
| 142 | 3rd | ND  | YES | NO  | 0 | 0 | POS |
| 143 | 3rd | NP  | YES | YES | 1 | 1 | POS |
| 144 | 3rd | ND  | NO  | YES | 1 | 1 | POS |
| 145 | 3rd | NP  | YES | YES | 1 | 1 | POS |
| 146 | 3rd | NP  | YES | YES | 1 | 1 | POS |
| 147 | 3rd | NP  | YES | YES | 0 | 1 | POS |
| 148 | 3rd | POS | NO  | NO  | 0 | 0 | POS |
| 149 | 3rd | NP  | NO  | NO  | 0 | 0 | NEG |
| 150 | 3rd | ND  | NO  | NO  | 1 | 1 | POS |
| 151 | 3rd | NP  | YES | NO  | 0 | 0 | NEG |
| 152 | 3rd | NP  | NO  | NO  | 0 | 0 | NEG |
| 153 | 3rd | NP  | NO  | NO  | 1 | 1 | POS |
| 154 | 3rd | NP  | NO  | YES | 1 | 1 | POS |
| 155 | 3rd | ND  | NO  | YES | 1 | 1 | POS |
| 156 | 3rd | POS | YES | YES | 1 | 1 | POS |
| 157 | 3rd | POS | NO  | YES | 1 | 1 | POS |
| 158 | 3rd | NP  | YES | YES | 1 | 1 | POS |
| 159 | 3rd | NP  | NO  | YES | 1 | 1 | POS |
| 160 | 3rd | NP  | NO  | YES | 1 | 1 | POS |
| 161 | 3rd | NP  | YES | YES | 0 | 1 | POS |
| 162 | 3rd | NP  | YES | YES | 0 | 1 | POS |
| 163 | 3rd | NP  | NO  | YES | 0 | 1 | POS |
| 164 | 3rd | NP  | YES | YES | 0 | 1 | POS |
| 165 | 3rd | NP  | YES | YES | 0 | 1 | POS |
| 166 | 3rd | NP  | YES | YES | 0 | 1 | POS |
| 167 | 3rd | POS | YES | YES | 0 | 1 | NR  |
| 168 | 3rd | ND  | NO  | NO  | 1 | 1 | POS |
| 169 | 3rd | POS | NO  | NO  | 0 | 0 | POS |
| 170 | 3rd | NP  | NO  | NO  | 0 | 0 | POS |
| 171 | 3rd | NP  | NO  | NO  | 1 | 1 | POS |
| 172 | 3rd | NP  | NO  | YES | 1 | 1 | POS |

|     |     |     |     |     |   |   |     |
|-----|-----|-----|-----|-----|---|---|-----|
| 173 | 3rd | ND  | NO  | YES | 1 | 1 | POS |
| 174 | 3rd | ND  | YES | YES | 1 | 1 | POS |
| 175 | 3rd | NP  | YES | YES | 0 | 1 | POS |
| 176 | 3rd | POS | NO  | YES | 0 | 1 | NEG |
| 177 | 3rd | NP  | YES | YES | 0 | 1 | POS |
| 178 | 3rd | NP  | NO  | NO  | 0 | 0 | POS |
| 179 | 3rd | NP  | NO  | NO  | 1 | 1 | POS |
| 180 | 3rd | NP  | NO  | NO  | 0 | 0 | NEG |
| 181 | 3rd | NP  | NO  | YES | 1 | 1 | POS |
| 182 | 3rd | NP  | NO  | YES | 0 | 1 | POS |
| 183 | 3rd | NP  | NO  | YES | 0 | 1 | POS |
| 184 | 3rd | NP  | NO  | YES | 0 | 1 | POS |
| 185 | 3rd | NP  | NO  | NO  | 0 | 0 | NEG |
| 186 | 3rd | POS | NO  | NO  | 1 | 1 | POS |
| 187 | 3rd | NP  | NO  | NO  | 0 | 0 | NEG |
| 188 | 3rd | NP  | NO  | NO  | 0 | 0 | NEG |
| 189 | 3rd | NP  | NO  | NO  | 1 | 1 | POS |
| 190 | 3rd | NP  | YES | YES | 1 | 1 | NEG |
| 191 | 3rd | NP  | NO  | YES | 1 | 1 | POS |
| 192 | 3rd | POS | NO  | YES | 1 | 1 | POS |
| 193 | 3rd | NP  | NO  | YES | 1 | 1 | POS |
| 194 | 3rd | NP  | YES | YES | 1 | 1 | POS |
| 195 | 3rd | POS | NO  | NO  | 0 | 0 | NEG |
| 196 | 3rd | NP  | YES | YES | 0 | 1 | POS |
| 197 | 3rd | NP  | YES | YES | 0 | 1 | POS |
| 198 | 3rd | NP  | NO  | YES | 0 | 1 | POS |
| 199 | 3rd | NP  | NO  | YES | 0 | 1 | NEG |
| 200 | 3rd | NP  | NO  | NO  | 0 | 0 | POS |
| 201 | 3rd | NP  | NO  | YES | 1 | 1 | POS |
| 202 | 3rd | NP  | NO  | NO  | 0 | 0 | POS |
| 203 | 3rd | NP  | NO  | YES | 1 | 1 | POS |
| 204 | 3rd | NEG | YES | YES | 1 | 1 | POS |
| 205 | 3rd | POS | YES | YES | 1 | 1 | POS |
| 206 | 3rd | ND  | YES | YES | 1 | 1 | POS |
| 207 | 3rd | ND  | NO  | YES | 1 | 1 | POS |
| 208 | 3rd | NEG | NO  | NO  | 1 | 1 | POS |
| 209 | 3rd | ND  | YES | YES | 1 | 1 | POS |
| 210 | 3rd | ND  | YES | NO  | 1 | 1 | POS |
| 211 | 3rd | NP  | NO  | NO  | 1 | 1 | POS |
| 212 | 3rd | POS | YES | YES | 1 | 1 | POS |
| 213 | 3rd | ND  | NO  | YES | 1 | 1 | POS |
| 214 | 3rd | POS | NO  | YES | 1 | 1 | POS |
| 215 | 3rd | ND  | NO  | YES | 1 | 1 | POS |
| 216 | 3rd | ND  | NO  | YES | 1 | 1 | POS |
| 217 | 3rd | ND  | YES | YES | 1 | 1 | POS |

|     |     |     |     |     |   |   |     |
|-----|-----|-----|-----|-----|---|---|-----|
| 218 | 3rd | ND  | YES | YES | 1 | 1 | POS |
| 219 | 3rd | ND  | YES | YES | 1 | 1 | POS |
| 220 | 3rd | ND  | YES | YES | 1 | 1 | POS |
| 221 | 3rd | NP  | YES | YES | 1 | 1 | POS |
| 222 | 3rd | POS | NO  | NO  | 0 | 0 | NEG |
| 223 | 3rd | ND  | NO  | YES | 0 | 1 | NEG |
| 224 | ND  | NP  | NO  | NO  | 1 | 1 | POS |
| 225 | ND  | POS | NO  | NO  | 1 | 1 | POS |
| 226 | ND  | ND  | NO  | NO  | 1 | 1 | POS |
| 227 | ND  | ND  | NO  | NO  | 1 | 1 | POS |
| 228 | ND  | NEG | NO  | NO  | 0 | 0 | NEG |
| 229 | ND  | POS | NO  | NO  | 1 | 1 | POS |
| 230 | ND  | NEG | NO  | NO  | 0 | 0 | NEG |
| 231 | ND  | ND  | NO  | YES | 1 | 1 | POS |
| 232 | ND  | POS | NO  | YES | 1 | 1 | POS |
| 233 | ND  | NP  | NO  | NO  | 1 | 1 | POS |
| 234 | ND  | ND  | YES | YES | 1 | 1 | POS |
| 235 | ND  | NP  | NO  | NO  | 1 | 1 | POS |
| 236 | ND  | NP  | NO  | NO  | 1 | 1 | POS |
| 237 | ND  | ND  | YES | YES | 1 | 1 | POS |
| 238 | ND  | POS | NO  | NO  | 1 | 1 | POS |
| 239 | ND  | ND  | NO  | YES | 1 | 1 | POS |
| 240 | ND  | POS | NO  | NO  | 0 | 0 | NEG |
| 241 | ND  | ND  | NO  | YES | 1 | 1 | POS |
| 242 | ND  | NP  | NO  | YES | 1 | 1 | POS |
| 243 | ND  | NP  | NO  | NO  | 0 | 0 | NEG |
| 244 | ND  | ND  | NO  | YES | 1 | 1 | POS |
| 245 | ND  | POS | NO  | YES | 1 | 1 | POS |
| 246 | ND  | NP  | NO  | YES | 1 | 1 | POS |
| 247 | ND  | NP  | YES | YES | 1 | 1 | POS |
| 248 | ND  | ND  | NO  | YES | 1 | 1 | POS |
| 249 | ND  | NP  | YES | NO  | 0 | 0 | POS |
| 250 | ND  | NP  | NO  | NO  | 1 | 1 | POS |
| 251 | ND  | NP  | YES | NO  | 1 | 1 | POS |
| 252 | ND  | NP  | NO  | NO  | 1 | 1 | POS |
| 253 | ND  | NP  | NO  | NO  | 1 | 1 | NEG |
| 254 | ND  | POS | NO  | NO  | 1 | 1 | POS |
| 255 | ND  | POS | YES | YES | 0 | 1 | NEG |
| 256 | ND  | NP  | NO  | NO  | 1 | 1 | NEG |
| 257 | ND  | POS | NO  | YES | 0 | 1 | NEG |
| 258 | ND  | POS | YES | YES | 0 | 1 | POS |

**Table 2 (Supplementary information).** Detail of the retrospective reading of the immunoblot mother-child pair in the CT group. POS: positive result; NEG: negative result; trim: trimester; ND: no data; NP: not performed.
